# Supplementary figures and images for: Stakeholder‐driven principles for advancing equity through shared measurement
Source: PubMed Central journal article supplement — Health Serv Res. 2022 Jul 22;57(Suppl 2):291–303. doi: 10.1111/1475-6773.14031 (PMC9660421; doi:10.1111/1475-6773.14031), 2022-07-22

Figure S1. Summary of Formative Activities to Inform Delphi Process

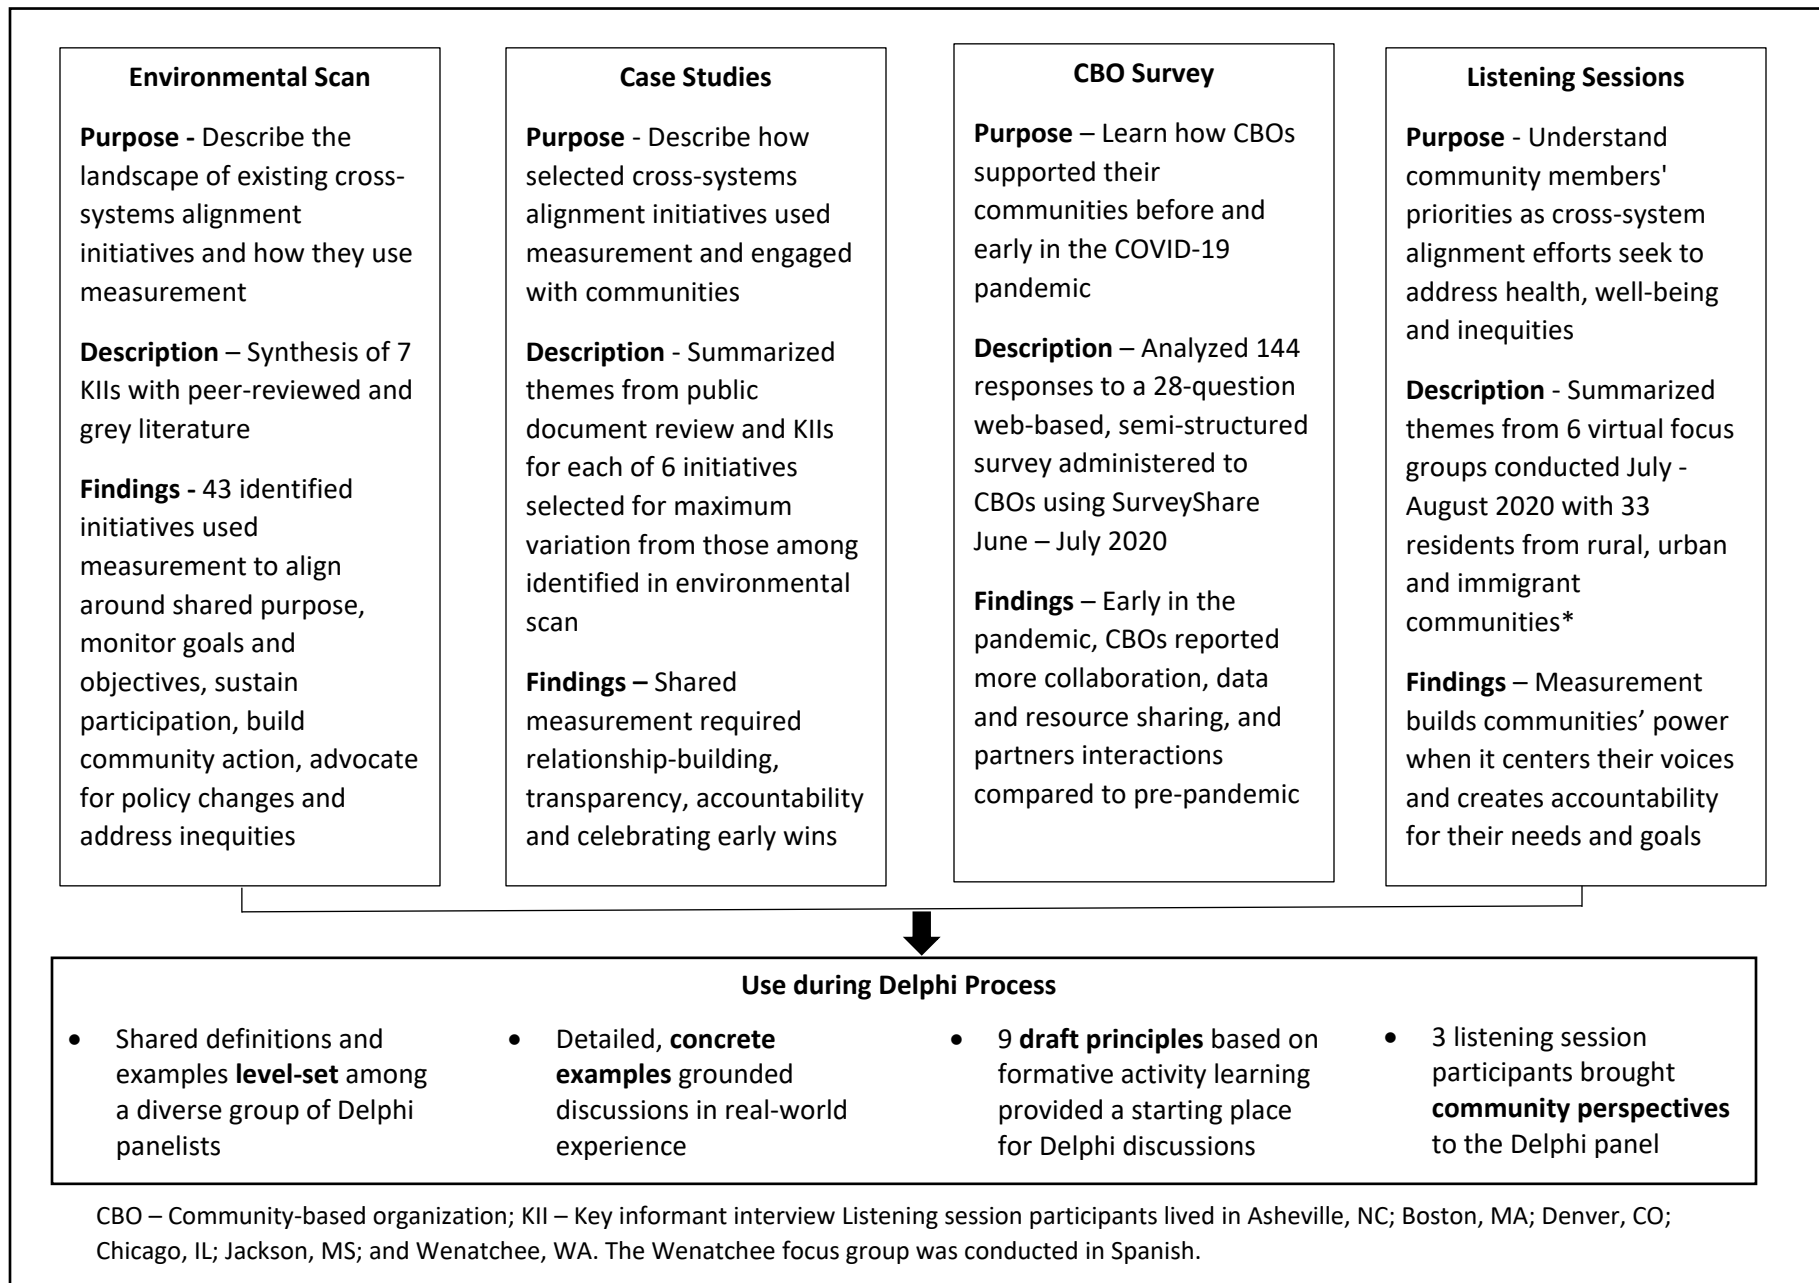

Supplement: HESR-57-291-s002.pdf [file HESR-57-291-s002.pdf]
